# Supplementary material for: Animal models of Diamond-Blackfan anemia: updates and challenges
Source: PubMed Central journal article supplement — Haematologica. 2022 Nov 17;108(5):1222–31. doi: 10.3324/haematol.2022.282042 (PMC10153544; doi:10.3324/haematol.2022.282042), 2022-11-17
Supplement: 2022_282042_LIU_SUPPL.pdf [file 2022_282042_LIU_SUPPL.pdf]

# Animal models of Diamond-Blackfan anemia: updates and challenges

Y. Lucy Liu,<sup>1</sup> Aya Shibuya,<sup>1</sup> Bertil Glader,<sup>1,2</sup> Mark C. Wilkes,<sup>1</sup> Maria Barna<sup>3</sup> and Kathleen M. Sakamoto<sup>1</sup>

<sup>1</sup>Department of Pediatrics, <sup>2</sup>Department of Pathology, and <sup>3</sup>Department of Genetics, Stanford University, Stanford, CA, USA

**Correspondence:** K.M. Sakamoto  
[kmsakamo@stanford.edu](mailto:kmsakamo@stanford.edu)

**Received:** September 5, 2022.

**Accepted:** November 10, 2022.

**Early view:** November 17, 2022.

<https://doi.org/10.3324/haematol.2022.282042>

©2023 Ferrata Storti Foundation

Published under a CC BY-NC license

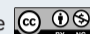

**Suppl. Table-1: Genetic alternations and clinical manifestations in DBA patients**

| Gene (Protein)       | % in DBA*     | Alternation                                          | Age at diagnosis     | Hematopoiesis |              |               | Malformation** | Reference             |      |
|----------------------|---------------|------------------------------------------------------|----------------------|---------------|--------------|---------------|----------------|-----------------------|------|
|                      |               |                                                      |                      | Anemia        | Elevated HbF | Elevated eADA |                | Author                | Year |
| <b>RPS19 (eS19)</b>  | 25-30%        | G120A                                                | 2 months             | Yes           | N/A***       | N/A           | No             | Matsson et al         | 1999 |
|                      |               | 329delG                                              | 1 year               |               |              |               |                |                       |      |
|                      |               | C302T                                                | 10 months            |               |              |               |                |                       |      |
|                      |               | 160insCT                                             | 15 months            | Yes           | Yes          | Yes           | Yes            | Draptchinskaja et al  | 1999 |
|                      |               | C302T                                                | 1 month              |               |              |               |                |                       |      |
|                      |               | c.172+1G>A                                           | 8 months             |               |              |               |                |                       |      |
| c.185G>A             | Birth-23 yeas | Yes                                                  | Yes                  | Yes           | Yes          | Cole et al    | 2022           |                       |      |
| <b>RPL11 (uL5)</b>   | 5-20%         | c.59T>A, c.357T>G                                    | Birth                | Yes           | Yes          | N/A           | Yes            | Cmejla et al          | 2009 |
|                      |               | Small indel                                          | Birth-2 months       | Yes           | N/A          | Yes           | Yes            | Quarello et al        | 2020 |
|                      |               | Nonsense, splice site, small indel                   | 1 month-21 yrs       | Yes           | N/A          | N/A           | Yes            | Gazda et al           | 2008 |
|                      |               | Nonsense, missense, splice site, small indel         | Birth-10 months      | Yes           | N/A          | N/A           | Yes            | Gazda et al           | 2008 |
| <b>RPL5 (uL18)</b>   | 7-12%         | Small indel                                          | Birth-24 months      | Yes           | N/A          | Yes           | Yes            | Quarello et al        | 2020 |
|                      |               | Point mutations, splice site                         | Birth                | Yes           | N/A          | N/A           | Yes            | Cmejla et al          | 2009 |
|                      |               | Small indel                                          | 2 months             | Yes           | N/A          | N/A           | Yes            | Gazda et al           | 2008 |
| <b>RPL36 (eL36)</b>  | <1%           | Small indel                                          | 2 months             | Yes           | N/A          | N/A           | Yes            | Gazda et al           | 2008 |
| <b>RPS26 (eS26)</b>  | 6.6-9%        | 9 distinct mutations                                 | 6 weeks-8 months     | Yes           | N/A          | N/A           | No             | Doherty et al         | 2010 |
| <b>RPS10 (eS10)</b>  | 1-3%          | 3 distinct mutations                                 | Birth-12 years       | Yes           | N/A          | N/A           | No             | Doherty et al         | 2010 |
| <b>RPS7 (eS7)</b>    | ~1%           | Missense mutation                                    | Adulthood            | Yes           | N/A          | Yes           | No             | Volejnikova et al     | 2020 |
|                      |               | Splice site variant                                  | 1st year             | Yes           | N/A          | N/A           | Yes            | Akram et al           | 2020 |
|                      |               | c.76-1G>T                                            | Early infancy        | Yes           | N/A          | Yes           | Yes            | Ichimura et al        | 2017 |
|                      |               | Splice site in intron 1                              | 1st year             | Yes           | N/A          | N/A           | Yes            | Smetanina et al       | 2015 |
| <b>RPL35A (eL33)</b> | 2-3%          | Gene deletion                                        | 4 months             | Yes           | N/A          | Yes           | Yes            | Quarello et al        | 2020 |
|                      |               | Allelic del, c.304 C>T, c.82_84delCTT                | 2-14 months          | Yes           | N/A          | Yes           | Yes            | Farrar et al          | 2008 |
|                      |               | Large deletion                                       | Birth                | Yes           | Yes          | Yes           | Yes            | Gianferante et al     | 2021 |
| <b>RPS24 (eS24)</b>  | 2-3%          | Nonsense mutation in Exon 4                          | N/A                  | Yes           | No           | Yes           | N/A            | Gazda et al           | 2006 |
| <b>RPS17 (eS17)</b>  | 1-3%          | Nonsense mutation                                    | Birth, 11 months     | Yes           | N/A          | Yes           | Yes            | Gerrard et al         | 2013 |
|                      |               | c.2T>G                                               | 6 months             | Yes           | N/A          | Yes           | Yes            | Cmejla et al          | 2007 |
|                      |               | c.1A>G                                               | 5 months             | Yes           | N/A          | N/A           | Yes            | Song et al            | 2010 |
| <b>RPL9 (uL6)</b>    | <1%           | c.-2+1G>C, c.59T>C; c.59T>C                          | 6 months             | Yes           | Yes          | No            | Yes            | Lezzerini et al       | 2020 |
| <b>RPL15 (eL15)</b>  | ~1%           | Deletion of intron 3 and exon 4                      | Birth                | Yes           | N/A          | N/A           | Yes            | Landowski et al       | 2013 |
|                      |               | c.242dupA, c.85C>T, c.29T>C, c.458A>C                | Prenatal to 6 months | Yes           | Yes          | Yes           | Yes            | Wlodarski et al       | 2018 |
| <b>RPS29 (uS14)</b>  | ~1%           | p.I31F, p.I50T                                       | 3 months-9 years     | Yes           | No           | Yes           | No             | Mirabello et al       | 2014 |
| <b>RPS20 (uS10)</b>  | rare          | c.251T>A, c.251T>G                                   | 1st month            | Yes           | N/A          | Yes           | No             | Bhar et al            | 2020 |
| <b>RPL26 (uL24)</b>  | Rare          | C.120_121delGA (nonsense mutation)                   | Birth                | Yes           | Yes          | N/A           | Yes            | Gazda et al           | 2012 |
| <b>RPS27A (eS31)</b> | Rare          | c.169T>C                                             | 15 months            | Yes           | N/A          | N/A           | Yes            | Gazda et al           | 2008 |
| <b>RPS28 (eS28)</b>  | Rare          | c.1A>G                                               | Infancy              | Yes           | N/A          | N/A           | Yes            | Gripp et al           | 2014 |
| <b>GATA1</b>         | <1%           | chX: 48,649,736 G>C; chX: 48,649,736-48,649,737Gdel  | Birth, 1.6 months    | Yes           | Yes          | Yes           | N/A            | Sankaran et al        | 2012 |
|                      |               | c.220G>C                                             | 3 months             | Yes           | Yes          | Yes           | No             | Klar et al            | 2014 |
|                      |               | c.2T>C                                               | 27 and 28 yrs        | Yes           | N/A          | N/A           | N/A            | Ludwig et al          | 2014 |
|                      |               | c.2T>C                                               | 9 months             | Yes           | N/A          | Yes           | No             | Parrella et al        | 2014 |
|                      |               | c.2T>C, c.220+2T>C                                   | 7 months and 5 yrs   | Yes           | Yes          | Yes           | No             | van Dooijeweert et al | 2022 |
| <b>TSR2</b>          | Rare          | c.191A>G                                             | 10 months            | Yes           | Yes          | Yes           | Yes            | Gripp et al           | 2014 |
| <b>HEATR3</b>        | Rare          | c.1751G>A, c.1337G>A, c.399+1G>T, c.719C>T, c.400T>C | 5-20yrs              | Yes           | N/A          | N/A           | Yes            | O'Donohue et al       | 2022 |
| <b>EPO</b>           | One case      | chr7:100320704 G>A                                   | 1st year             | Yes           | N/A          | N/A           | N/A            | Kim et al             | 2017 |

\* Resource from <https://www.ncbi.nlm.nih.gov/books/NBK7047/> and <https://www.ncbi.nlm.nih.gov/pubmed/34889440>

\*\*Malformation

\*\*\* N/A: Not available
